# Supplementary material for: Molecular Signature of Monocytes Shaped by the Shigella sonnei 1790-Generalized Modules for Membrane Antigens Vaccine
Source: MDPI journal article supplement (doi:10.3390/ijms25021116), 2024-01-17
Supplement: s1 [file s1]

## Supplementary Figures

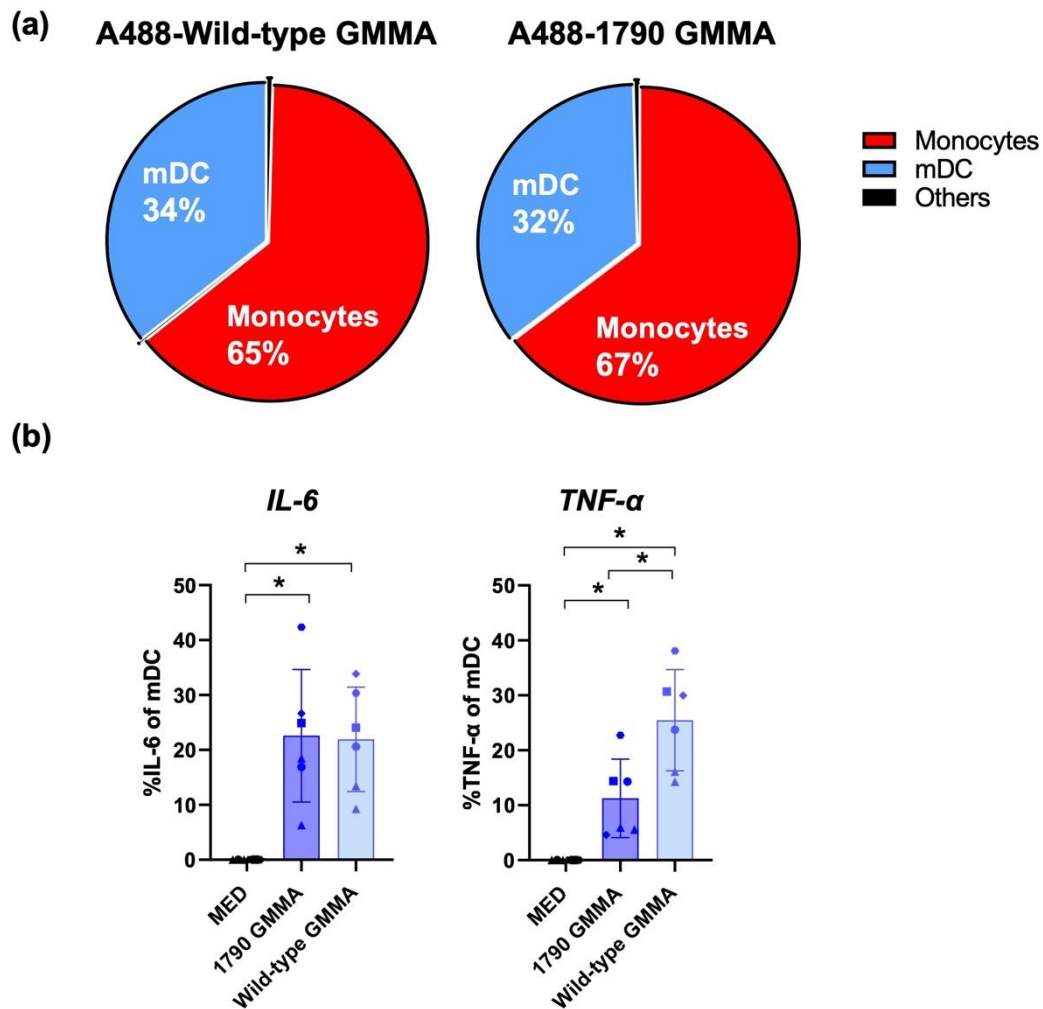

**Supplementary Figure S1.** (a) Flow cytometry analysis for detection of *S. sonnei* A488-Wild-type GMMA and A488-1790 GMMA positive cells after 1 hour of stimulation. Pie chart shows that two cell populations, monocytes (red) and mDC (blue), have the highest percentage of cells positive for both A488-GMMA. The remaining 1% is represented by other immune cell populations (black). (b) Intracellular cytokine production in mDC after 22 hours of stimulation with 1790 GMMA (dark blue) and wild-type GMMA (light blue), and Brefeldin A after 30 minutes of treatment. Histograms show a high percentage of IL-6 and TNF- $\alpha$  production by mDC. Percentages were calculated on manually gated cell population. Different dots represent different donors tested (six). Error bars indicate standard deviations (SD). MED is referred to negative control samples (not treated). Significance was estimated using the paired Wilcoxon test (\* $p < 0.05$ ). Significant differences among stimuli are shown explicitly while non-significant differences are not shown.
